# Supplementary material
Source: HighWire-hosted journal article supplement (https://www.cmaj.ca/content/suppl/2011/09/26/cmaj.100912)
Supplement: bleed-rahme-1-at.pdf [file bleed-rahme-1-at.pdf]

**Appendix 1 (as supplied by the authors): Diagnostic codes (ICD-9 and ICD-10 codes) used to identify in-hospital bleeding episodes**

|                                                                                     | <b>ICD-9 codes</b> | <b>ICD-10 codes</b> |
|-------------------------------------------------------------------------------------|--------------------|---------------------|
| <b>Digestive system</b>                                                             |                    |                     |
| Gastric ulcer, gastritis, hemorrhage                                                | 531.(0,2,4,6)      | K25.(0,2,4,6)       |
| Duodenal ulcer, hemorrhage                                                          | 532.(0,2,4,6)      | K26.(0,2,4,6)       |
|                                                                                     | 535.51             |                     |
|                                                                                     | 535.61             |                     |
| Peptic ulcer site unspecified, hemorrhage                                           | 533.(0,2,4,6)      | K27.(0,2,4,6)       |
| Gastrojejunal ulcer, hemorrhage                                                     | 534.(0,2,4,6)      | K28.(0,2,4,6)       |
| Gastrointestinal hemorrhage unspecified                                             | 578.9              | K92.2               |
| Hematemesis                                                                         | 578.0–578.9        | K92.0               |
| Melena                                                                              | 578.1              | K92.1               |
| Acute haemorrhagic gastritis                                                        | 535.01             | K29.x               |
|                                                                                     | 535.11             |                     |
|                                                                                     | 535.21             |                     |
|                                                                                     | 535.31             |                     |
|                                                                                     | 535.41             |                     |
| Angiodysplasia of stomach, small intestine or duodenum with hemorrhage              | 537.83             | K31.80              |
|                                                                                     | 537.84             | K31.88              |
|                                                                                     | 562.02             | K55.8               |
|                                                                                     | 562.03             | K63.80              |
|                                                                                     | 569.85             | K63.88              |
|                                                                                     | 569.86             | K91.80              |
| Haemorrhage of colon, anus and rectum                                               | 562.12             | I84(1,4,8)          |
|                                                                                     | 562.13             | K55.20              |
|                                                                                     | 569.3              | K62.5               |
| <b>Cerebral</b>                                                                     |                    |                     |
| Subarachnoid hemorrhage                                                             | 430                | I60.x               |
| Intracerebral hemorrhage                                                            | 431                | I61.x               |
| Other unspecified intracranial hemorrhage                                           | 432                | I62.x               |
|                                                                                     | 432.0              |                     |
| Intracranial hemorrhage due to trauma (could be worsened by antithrombotic therapy) | 852.0              | S06.(4,5,6,7)       |
|                                                                                     | 852.1              |                     |
|                                                                                     | 853                |                     |
| Secondary hemorrhage                                                                | 958.2              |                     |
| <b>Respiratory</b>                                                                  |                    |                     |
| Haemorrhage from respiratory passages (nose throat lung)                            | 784.7              | R04.x               |
|                                                                                     | 784.8              |                     |
|                                                                                     | 786.3              |                     |
| <b>Other</b>                                                                        |                    |                     |
| Hematuria                                                                           | 599.7              |                     |
| Purpura                                                                             | 287.1              |                     |
|                                                                                     | 287.2              |                     |
| Hemorrhage not specified                                                            | 459.0              |                     |
| Esophagus                                                                           | 784.8              | I85.0               |
|                                                                                     |                    | I98.2               |
